# Supplementary material for: Non-Cytokine Protein Profile of the Mesenchymal Stem Cell Secretome That Regulates the Androgen Production Pathway
Source: MDPI journal article supplement (doi:10.3390/ijms23094633), 2022-04-22
Supplement: s1 [file s1]

**Supplementary Table S1. Altered Protein profile total MSC conditioned media.**

| <b>Description</b>                                                                                         | <b>Sum PEP<br/>Score</b> | <b>Coverage<br/>[%]</b> | <b>MW<br/>[kDa]</b> | <b>Abundance<br/>Ratio:<br/>(Sample /<br/>Control)</b> | <b>Abundance<br/>Ratio Adj. P-<br/>Value</b> |
|------------------------------------------------------------------------------------------------------------|--------------------------|-------------------------|---------------------|--------------------------------------------------------|----------------------------------------------|
| <b>Angiopoietin-2 OS=Homo sapiens GN=ANGPT2 PE=1 SV=1</b>                                                  | 6.262                    | 6                       | 56.9                | 11.333                                                 | 0.086016647                                  |
| <b>Hyaluronan and proteoglycan link protein 1 OS=Homo sapiens GN=HAPLN1 PE=2 SV=2</b>                      | 48.902                   | 29                      | 40.1                | 8.549                                                  | 0.064898916                                  |
| <b>Carboxypeptidase A4 OS=Homo sapiens GN=CPA4 PE=1 SV=2</b>                                               | 30.125                   | 17                      | 47.3                | 7.553                                                  | 0.047364885                                  |
| <b>Serglycin OS=Homo sapiens GN=SRGN PE=1 SV=3</b>                                                         | 55.725                   | 39                      | 17.6                | 6.639                                                  | 0.037023471                                  |
| <b>Alpha-2-HS-glycoprotein OS=Homo sapiens GN=AHSG PE=1 SV=1</b>                                           | 19.152                   | 7                       | 39.4                | 6.204                                                  | 0.083869466                                  |
| <b>Insulin-like growth factor-binding protein 7 OS=Homo sapiens GN=IGFBP7 PE=1 SV=1</b>                    | 211.289                  | 61                      | 29.1                | 5.569                                                  | 0.059417864                                  |
| <b>Proenkephalin-A OS=Homo sapiens GN=PENK PE=1 SV=1</b>                                                   | 32.579                   | 23                      | 30.8                | 5.472                                                  | 0.054622459                                  |
| <b>Protein HP-20 homolog OS=Bos taurus PE=2 SV=1</b>                                                       | 18.692                   | 19                      | 20.6                | 5.269                                                  | 0.053527124                                  |
| <b>Insulin-like growth factor-binding protein 5 OS=Homo sapiens GN=IGFBP5 PE=1 SV=1</b>                    | 66.056                   | 52                      | 30.6                | 5.122                                                  | 0.040098658                                  |
| <b>Apolipoprotein A-II OS=Bos taurus GN=APOA2 PE=1 SV=2</b>                                                | 39.568                   | 43                      | 11.2                | 5.033                                                  | 0.059417864                                  |
| <b>Insulin-like growth factor-binding protein 2 OS=Homo sapiens GN=IGFBP2 PE=1 SV=2</b>                    | 97.513                   | 48                      | 34.8                | 4.785                                                  | 0.052795147                                  |
| <b>EGF-like repeat and discoidin I-like domain-containing protein 3 OS=Homo sapiens GN=EDIL3 PE=1 SV=1</b> | 34.401                   | 20                      | 53.7                | 4.75                                                   | 0.047356137                                  |
| <b>Thrombospondin-1 (Fragment) OS=Bos taurus PE=2 SV=1</b>                                                 | 146.73                   | 70                      | 25                  | 4.36                                                   | 0.077312745                                  |
| <b>Signal peptide, CUB and EGF-like domain-containing protein 3 OS=Homo sapiens GN=SCUBE3 PE=1 SV=1</b>    | 26.842                   | 12                      | 109.2               | 4.306                                                  | 0.054666294                                  |
| <b>40S ribosomal protein S15a OS=Homo sapiens GN=RPS15A PE=1 SV=2</b>                                      | 4.433                    | 26                      | 14.8                | 4.058                                                  | 0.104469424                                  |

|                                                                                     |         |    |       |       |             |
|-------------------------------------------------------------------------------------|---------|----|-------|-------|-------------|
| Angiotensinogen OS=Bos taurus<br>GN=AGT PE=2 SV=1                                   | 71.919  | 26 | 45.4  | 4.047 | 0.083418924 |
| Retinol-binding protein 4<br>OS=Homo sapiens GN=RBP4<br>PE=1 SV=3                   | 11.259  | 9  | 23    | 4.04  | 0.076036742 |
| Alpha-2-HS-glycoprotein OS=Bos<br>taurus GN=AHSG PE=1 SV=2                          | 536.213 | 70 | 38.4  | 3.863 | 0.099319929 |
| (Bos taurus) 54 kDa protein<br>[OS=Bos taurus]                                      | 407.115 | 58 | 53.6  | 3.71  | 0.083387977 |
| Complement factor B (Fragment)<br>OS=Bos taurus GN=BF PE=4 SV=1                     | 23.458  | 38 | 9.1   | 3.681 | 0.06751879  |
| Integral membrane protein 2B<br>OS=Homo sapiens GN=ITM2B<br>PE=1 SV=1               | 4.678   | 7  | 30.3  | 3.674 | 0.047364885 |
| SERPIND1 protein OS=Bos taurus<br>GN=SERPIND1 PE=2 SV=1                             | 83.144  | 31 | 55.2  | 3.66  | 0.049935383 |
| SERPINA10 protein OS=Bos<br>taurus GN=SERPINA10 PE=2<br>SV=1                        | 16.47   | 8  | 52    | 3.64  | 0.066748056 |
| Exportin-1 OS=Homo sapiens<br>GN=XPO1 PE=1 SV=1                                     | 9.737   | 3  | 123.3 | 3.637 | 0.064898916 |
| Alpha-1-acid glycoprotein<br>OS=Bos taurus GN=ORM1 PE=2<br>SV=1                     | 240.539 | 59 | 23.2  | 3.59  | 0.071992388 |
| Thrombospondin-4 OS=Homo<br>sapiens GN=THBS4 PE=1 SV=2                              | 37.86   | 10 | 105.8 | 3.562 | 0.067696091 |
| Apolipoprotein A-I OS=Bos<br>taurus GN=APOA1 PE=1 SV=3                              | 325.409 | 82 | 30.3  | 3.528 | 0.104469424 |
| Serpin A3-1 OS=Bos taurus<br>GN=SERPINA3-1 PE=1 SV=3                                | 103.595 | 40 | 46.2  | 3.512 | 0.093577566 |
| Protein AMBP OS=Bos taurus<br>GN=AMBP PE=1 SV=2                                     | 132.777 | 36 | 39.2  | 3.505 | 0.083387977 |
| Complement component C5a<br>(Fragment) OS=Bos taurus PE=2<br>SV=1                   | 12.93   | 50 | 8.5   | 3.439 | 0.104469424 |
| Factor XIIIa inhibitor OS=Bos<br>taurus PE=1 SV=1                                   | 28.542  | 12 | 51.7  | 3.409 | 0.103940476 |
| Inter-alpha-trypsin inhibitor<br>heavy chain H4 OS=Bos taurus<br>GN=ITIH4 PE=1 SV=1 | 201.764 | 33 | 101.4 | 3.345 | 0.080994635 |
| Alpha-2-antiplasmin OS=Bos<br>taurus GN=SERPINF2 PE=1 SV=2                          | 117.779 | 29 | 54.7  | 3.342 | 0.064898916 |
| Antithrombin-III OS=Bos taurus<br>GN=SERPINC1 PE=1 SV=2                             | 199.336 | 53 | 52.3  | 3.308 | 0.071767666 |
| Fetuin-B OS=Bos taurus<br>GN=FETUB PE=2 SV=1                                        | 308.162 | 47 | 42.6  | 3.304 | 0.059417864 |

|                                                                                                                    |          |    |       |       |             |
|--------------------------------------------------------------------------------------------------------------------|----------|----|-------|-------|-------------|
| <b>Connective tissue growth factor</b><br>OS=Homo sapiens GN=CTGF<br>PE=1 SV=2                                     | 79.949   | 51 | 38.1  | 3.303 | 0.058698427 |
| <b>Serum albumin</b> OS=Bos taurus<br>GN=ALB PE=1 SV=4                                                             | 1817.058 | 87 | 69.2  | 3.303 | 0.067501413 |
| <b>(Bos taurus) similar to</b><br><b>Complement C4-A precursor</b><br>[OS=Bos taurus]                              | 257.262  | 32 | 192.9 | 3.287 | 0.101595024 |
| <b>Chitinase-3-like protein 1</b><br>OS=Homo sapiens GN=CHI3L1<br>PE=1 SV=2                                        | 14.179   | 13 | 42.6  | 3.275 | 0.047356137 |
| <b>Inter-alpha-trypsin inhibitor</b><br><b>heavy chain H3</b> OS=Homo<br>sapiens GN=ITIH3 PE=1 SV=2                | 24.939   | 5  | 99.8  | 3.274 | 0.066748056 |
| <b>Prothrombin</b> OS=Bos taurus<br>GN=F2 PE=1 SV=2                                                                | 219.885  | 50 | 70.5  | 3.253 | 0.067501413 |
| <b>Insulin-like growth factor-</b><br><b>binding protein 4</b> OS=Homo<br>sapiens GN=IGFBP4 PE=1 SV=2              | 135.293  | 46 | 27.9  | 3.225 | 0.064898916 |
| <b>Vitamin D-binding protein</b><br>OS=Bos taurus GN=GC PE=2<br>SV=1                                               | 428.081  | 62 | 53.3  | 3.209 | 0.080994635 |
| <b>(Bos taurus) similar to fibulin-1 C</b><br><b>isoform 1</b> [OS=Bos taurus]                                     | 174.169  | 37 | 77.4  | 3.204 | 0.059417864 |
| <b>Serotransferrin</b> OS=Bos taurus<br>GN=TF PE=2 SV=1                                                            | 1768.648 | 87 | 77.7  | 3.176 | 0.053527124 |
| <b>Ras-related protein Rab-5A</b><br>OS=Homo sapiens GN=RAB5A<br>PE=1 SV=2                                         | 11.64    | 15 | 23.6  | 3.167 | 0.115351174 |
| <b>Complement component C9</b><br>OS=Bos taurus GN=C9 PE=2 SV=1                                                    | 42.33    | 26 | 62    | 3.148 | 0.067696091 |
| <b>Tyrosine-protein kinase receptor</b><br><b>UFO</b> OS=Homo sapiens GN=AXL<br>PE=1 SV=3                          | 9.291    | 3  | 98.3  | 3.146 | 0.071992388 |
| <b>Thyroxine-binding globulin</b><br>OS=Bos taurus GN=SERPINA7<br>PE=2 SV=1                                        | 60.602   | 27 | 46    | 3.124 | 0.080068185 |
| <b>Polypeptide N-</b><br><b>acetylgalactosaminyltransferase</b><br><b>5</b> OS=Homo sapiens GN=GALNT5<br>PE=1 SV=1 | 10.155   | 5  | 106.2 | 3.115 | 0.047356137 |
| <b>Pigment epithelium-derived</b><br><b>factor</b> OS=Bos taurus<br>GN=SERPINF1 PE=1 SV=1                          | 89.419   | 33 | 46.2  | 3.096 | 0.096141268 |
| <b>Lysyl oxidase homolog 2</b><br>OS=Homo sapiens GN=LOXL2<br>PE=1 SV=1                                            | 103.801  | 26 | 86.7  | 3.093 | 0.062726234 |

|                                                                                                             |         |    |       |       |             |
|-------------------------------------------------------------------------------------------------------------|---------|----|-------|-------|-------------|
| Cell migration-inducing and hyaluronan-binding protein<br>OS=Homo sapiens GN=CEMIP<br>PE=1 SV=2             | 25.064  | 7  | 152.9 | 3.086 | 0.080068185 |
| ApoN protein OS=Bos taurus<br>GN=ApoN PE=2 SV=1                                                             | 12.041  | 22 | 28.5  | 3.081 | 0.083869466 |
| Cadherin-6 OS=Homo sapiens<br>GN=CDH6 PE=1 SV=1                                                             | 10.89   | 5  | 88.3  | 3.077 | 0.067696091 |
| Plasma serine protease inhibitor<br>OS=Bos taurus GN=SERPINA5<br>PE=1 SV=1                                  | 52.394  | 29 | 45.3  | 3.069 | 0.078234816 |
| HLA class I histocompatibility antigen, A-3 alpha chain<br>OS=Homo sapiens GN=HLA-A<br>PE=1 SV=1            | 9.469   | 9  | 44.4  | 3.066 | 0.028004287 |
| Major prion protein OS=Homo sapiens<br>GN=PRNP PE=1 SV=1                                                    | 10.007  | 8  | 27.6  | 3.05  | 0.082593959 |
| (Bos taurus) similar to C4b-binding protein alpha chain<br>[OS=Bos taurus]                                  | 40.507  | 60 | 22.3  | 3.043 | 0.064898916 |
| Complement C3 OS=Bos taurus<br>GN=C3 PE=1 SV=2                                                              | 649.349 | 52 | 187.1 | 3.017 | 0.100034252 |
| Neogenin OS=Homo sapiens<br>GN=NEO1 PE=1 SV=2                                                               | 5.269   | 2  | 159.9 | 3.005 | 0.437286512 |
| Hemoglobin subunit beta<br>OS=Bos taurus GN=HBB PE=1<br>SV=1                                                | 22.351  | 20 | 15.9  | 2.993 | 0.137514708 |
| Alpha-1B-glycoprotein OS=Bos taurus<br>GN=A1BG PE=1 SV=1                                                    | 210.369 | 55 | 53.5  | 2.986 | 0.06751879  |
| Inter-alpha-trypsin inhibitor heavy chain H2<br>OS=Homo sapiens GN=ITI2 PE=1 SV=2                           | 60.865  | 7  | 106.4 | 2.978 | 0.073244736 |
| A disintegrin and metalloproteinase with thrombospondin motifs 2<br>OS=Homo sapiens GN=ADAMTS2<br>PE=2 SV=2 | 9.394   | 4  | 134.7 | 2.975 | 0.105281478 |
| Stanniocalcin-2 OS=Homo sapiens<br>GN=STC2 PE=1 SV=1                                                        | 48.604  | 34 | 33.2  | 2.97  | 0.06634983  |
| Biglycan OS=Homo sapiens<br>GN=BGN PE=1 SV=2                                                                | 224.183 | 51 | 41.6  | 2.967 | 0.083387977 |
| Plasminogen OS=Bos taurus<br>GN=PLG PE=1 SV=2                                                               | 405.856 | 73 | 91.2  | 2.96  | 0.067696091 |
| Proprotein convertase subtilisin/kexin type 9<br>OS=Homo sapiens GN=PCSK9 PE=1 SV=3                         | 7.018   | 4  | 74.2  | 2.907 | 0.071992388 |

|                                                                                              |         |    |       |       |             |
|----------------------------------------------------------------------------------------------|---------|----|-------|-------|-------------|
| <b>Regucalcin OS=Homo sapiens<br/>GN=RGN PE=1 SV=1</b>                                       | 9.749   | 9  | 33.2  | 2.881 | 0.136763538 |
| <b>Alpha-amylase OS=Bos taurus<br/>GN=AMY2A PE=2 SV=1</b>                                    | 19.861  | 15 | 57.4  | 2.879 | 0.072311413 |
| <b>(Bos taurus) 55 kDa protein<br/>[OS=Bos taurus]</b>                                       | 20.852  | 25 | 54.6  | 2.862 | 0.150309214 |
| <b>(Bos taurus) similar to Pregnancy<br/>zone protein, partial [OS=Bos<br/>taurus]</b>       | 60.824  | 23 | 65.2  | 2.859 | 0.080994635 |
| <b>Beta-2-glycoprotein 1 OS=Bos<br/>taurus GN=APOH PE=1 SV=4</b>                             | 155.558 | 48 | 38.2  | 2.859 | 0.067501413 |
| <b>Serpin A3-4 OS=Bos taurus<br/>GN=SERPINA3-4 PE=3 SV=1</b>                                 | 110.03  | 39 | 46.3  | 2.858 | 0.078234816 |
| <b>Clusterin OS=Bos taurus GN=CLU<br/>PE=1 SV=1</b>                                          | 98.7    | 37 | 51.1  | 2.836 | 0.092134553 |
| <b>(Bos taurus) similar to afamin<br/>[OS=Bos taurus]</b>                                    | 164.575 | 39 | 69.5  | 2.817 | 0.071992388 |
| <b>Acidic mammalian chitinase<br/>OS=Bos taurus GN=CHIA PE=1<br/>SV=1</b>                    | 27.644  | 15 | 52.1  | 2.762 | 0.080976111 |
| <b>Uncharacterized protein<br/>(Fragment) OS=Bos taurus<br/>GN=HGFAF PE=3 SV=2</b>           | 24.485  | 21 | 32.7  | 2.76  | 0.078234816 |
| <b>Inter-alpha-trypsin inhibitor<br/>heavy chain H1 OS=Bos taurus<br/>GN=ITIH1 PE=2 SV=1</b> | 95.315  | 18 | 101.2 | 2.756 | 0.071767666 |
| <b>(Bos taurus) similar to endopin<br/>2B [OS=Bos taurus]</b>                                | 134.587 | 29 | 46.9  | 2.752 | 0.081827115 |
| <b>(Bos taurus) 15 kDa protein<br/>[OS=Bos taurus]</b>                                       | 8.191   | 35 | 14.8  | 2.734 | 0.078234816 |
| <b>Complement C4 (Fragments)<br/>OS=Bos taurus GN=C4 PE=1 SV=2</b>                           | 122.072 | 31 | 101.8 | 2.724 | 0.124235574 |
| <b>Pregnancy zone protein<br/>OS=Homo sapiens GN=PZP PE=1<br/>SV=4</b>                       | 28.805  | 4  | 163.8 | 2.721 | 0.064898916 |
| <b>Complement factor H OS=Homo<br/>sapiens GN=CFH PE=1 SV=4</b>                              | 60.343  | 17 | 139   | 2.703 | 0.080976111 |
| <b>Apolipoprotein A-IV OS=Bos<br/>taurus GN=APOA4 PE=2 SV=1</b>                              | 49.37   | 30 | 43    | 2.679 | 0.096141268 |
| <b>Leucine-rich alpha-2-<br/>glycoprotein 1 OS=Bos taurus<br/>GN=LRG1 PE=2 SV=1</b>          | 45.798  | 27 | 38.3  | 2.675 | 0.06751879  |
| <b>Complement component C7<br/>OS=Bos taurus GN=C7 PE=2 SV=1</b>                             | 116.276 | 35 | 93    | 2.674 | 0.076514553 |
| <b>Beta-casein OS=Bos taurus<br/>GN=CSN2 PE=1 SV=2</b>                                       | 16.343  | 15 | 25.1  | 2.668 | 0.44977794  |

|                                                                                                       |         |    |       |       |             |
|-------------------------------------------------------------------------------------------------------|---------|----|-------|-------|-------------|
| <b>Complement factor H OS=Bos taurus GN=CFH PE=1 SV=3</b>                                             | 231.817 | 40 | 140.3 | 2.668 | 0.064898916 |
| <b>Cadherin-13 OS=Homo sapiens GN=CDH13 PE=1 SV=1</b>                                                 | 15.999  | 7  | 78.2  | 2.64  | 0.083418924 |
| <b>Complement factor I OS=Bos taurus GN=CFI PE=2 SV=1</b>                                             | 119.761 | 43 | 68.9  | 2.634 | 0.062726234 |
| <b>Poliovirus receptor OS=Homo sapiens GN=PVR PE=1 SV=1</b>                                           | 8.165   | 6  | 45.3  | 2.607 | 0.059417864 |
| <b>Carboxypeptidase N catalytic chain OS=Bos taurus GN=CPN1 PE=2 SV=1</b>                             | 11.645  | 10 | 52.6  | 2.604 | 0.083869466 |
| <b>Cartilage oligomeric matrix protein OS=Bos taurus GN=COMP PE=4 SV=2</b>                            | 105.026 | 29 | 81.8  | 2.6   | 0.073244736 |
| <b>Alpha-1-antiproteinase OS=Bos taurus GN=SERPINA1 PE=1 SV=1</b>                                     | 547.814 | 58 | 46.1  | 2.599 | 0.066373808 |
| <b>Periostin variant 7 OS=Bos taurus GN=POSTN PE=2 SV=1</b>                                           | 121.177 | 35 | 86.8  | 2.594 | 0.115196307 |
| <b>Dystroglycan OS=Homo sapiens GN=DAG1 PE=1 SV=2</b>                                                 | 31.245  | 8  | 97.4  | 2.592 | 0.105281478 |
| <b>Plasma kallikrein (Fragment) OS=Homo sapiens GN=KLKB1 PE=1 SV=1</b>                                | 6.01    | 1  | 76.8  | 2.585 | 0.064898916 |
| <b>Fibrinogen alpha chain OS=Bos taurus GN=FGA PE=1 SV=5</b>                                          | 138.762 | 37 | 67    | 2.547 | 0.080976111 |
| <b>Heterogeneous nuclear ribonucleoprotein U-like protein 2 OS=Homo sapiens GN=HNRNPUL2 PE=1 SV=1</b> | 6.087   | 3  | 85.1  | 2.533 | 0.170933315 |
| <b>Coiled-coil domain-containing protein 80 OS=Homo sapiens GN=CCDC80 PE=1 SV=1</b>                   | 96.68   | 25 | 108.1 | 2.532 | 0.084077711 |
| <b>Serum albumin OS=Homo sapiens GN=ALB PE=1 SV=2</b>                                                 | 110.096 | 19 | 69.3  | 2.524 | 0.143979347 |
| <b>Apolipoprotein E OS=Bos taurus GN=APOE PE=2 SV=1</b>                                               | 66.73   | 51 | 36    | 2.52  | 0.104469424 |
| <b>Membrane primary amine oxidase OS=Homo sapiens GN=AOC3 PE=1 SV=3</b>                               | 5.404   | 2  | 84.6  | 2.49  | 0.080976111 |
| <b>Thrombospondin-3 OS=Homo sapiens GN=THBS3 PE=1 SV=1</b>                                            | 47.06   | 13 | 104.1 | 2.489 | 0.089731259 |
| <b>Procollagen-lysine,2-oxoglutarate 5-dioxygenase 1 OS=Homo sapiens GN=PLOD1 PE=1 SV=2</b>           | 74.218  | 23 | 83.5  | 2.488 | 0.108390635 |
| <b>Alpha-fetoprotein OS=Bos taurus GN=AFP PE=2 SV=1</b>                                               | 733.54  | 76 | 68.5  | 2.477 | 0.090515344 |

|                                                                                                                     |          |    |       |       |             |
|---------------------------------------------------------------------------------------------------------------------|----------|----|-------|-------|-------------|
| <b>Carboxypeptidase B2 OS=Bos taurus GN=CPB2 PE=1 SV=1</b>                                                          | 14.17    | 11 | 48.8  | 2.475 | 0.064898916 |
| <b>Sushi repeat-containing protein SRPX2 OS=Homo sapiens GN=SRPX2 PE=1 SV=1</b>                                     | 10.41    | 9  | 52.9  | 2.469 | 0.083830482 |
| <b>Nascent polypeptide-associated complex subunit alpha, muscle-specific form OS=Homo sapiens GN=NACA PE=1 SV=1</b> | 9.945    | 1  | 205.3 | 2.463 | 0.143979347 |
| <b>Sulfhydryl oxidase 1 OS=Homo sapiens GN=QSOX1 PE=1 SV=3</b>                                                      | 120.018  | 34 | 82.5  | 2.451 | 0.102018238 |
| <b>Serotransferrin-like OS=Bos taurus GN=LOC525947 PE=2 SV=1</b>                                                    | 105.075  | 38 | 69.1  | 2.443 | 0.080519492 |
| <b>Matrin-3 OS=Homo sapiens GN=MATR3 PE=1 SV=1</b>                                                                  | 10.455   | 5  | 99.9  | 2.434 | 0.113598193 |
| <b>(Bos taurus) similar to alpha-2-macroglobulin isoform 1 [OS=Bos taurus]</b>                                      | 1084.417 | 62 | 164.2 | 2.433 | 0.105281478 |
| <b>(Bos taurus) 121 kDa protein [OS=Bos taurus]</b>                                                                 | 44.938   | 14 | 121.4 | 2.432 | 0.079190829 |
| <b>Galectin-3-binding protein OS=Homo sapiens GN=LGALS3BP PE=1 SV=1</b>                                             | 93.294   | 27 | 65.3  | 2.405 | 0.081354007 |
| <b>(Bos taurus) similar to apolipoprotein B, partial [OS=Bos taurus]</b>                                            | 167.02   | 41 | 92.2  | 2.358 | 0.113598193 |
| <b>Cadherin-11 OS=Homo sapiens GN=CDH11 PE=2 SV=2</b>                                                               | 19.631   | 10 | 87.9  | 2.356 | 0.066748056 |
| <b>Glial fibrillary acidic protein OS=Homo sapiens GN=GFAP PE=1 SV=1</b>                                            | 14.731   | 9  | 49.9  | 2.356 | 0.140126054 |
| <b>Latent-transforming growth factor beta-binding protein 3 OS=Homo sapiens GN=LTBP3 PE=1 SV=4</b>                  | 11.293   | 4  | 139.3 | 2.354 | 0.150086044 |
| <b>C-type mannose receptor 2 OS=Homo sapiens GN=MRC2 PE=1 SV=2</b>                                                  | 9.137    | 3  | 166.6 | 2.351 | 0.080976111 |
| <b>Complement C5 OS=Homo sapiens GN=C5 PE=1 SV=4</b>                                                                | 17.457   | 3  | 188.2 | 2.313 | 0.11714316  |
| <b>Aggrecan core protein OS=Homo sapiens GN=ACAN PE=1 SV=2</b>                                                      | 92.417   | 9  | 250   | 2.303 | 0.080994635 |
| <b>Semaphorin-7A OS=Homo sapiens GN=SEMA7A PE=1 SV=1</b>                                                            | 108.024  | 37 | 74.8  | 2.294 | 0.078234816 |

|                                                                                                                 |         |    |       |       |             |
|-----------------------------------------------------------------------------------------------------------------|---------|----|-------|-------|-------------|
| <b>C4b-binding protein alpha chain</b><br>OS=Bos taurus GN=C4BPA PE=2<br>SV=1                                   | 62.779  | 33 | 68.8  | 2.289 | 0.078234816 |
| <b>Uncharacterized protein</b> OS=Bos<br>taurus GN=VTN PE=2 SV=1                                                | 47.756  | 22 | 53.5  | 2.286 | 0.083387977 |
| <b>Thrombospondin-1</b> OS=Homo<br>sapiens GN=THBS1 PE=1 SV=2                                                   | 628.733 | 57 | 129.3 | 2.267 | 0.083387977 |
| <b>EH domain-containing protein 1</b><br>OS=Homo sapiens GN=EHD1<br>PE=1 SV=1                                   | 5.464   | 4  | 61.9  | 2.262 | 0.18113831  |
| <b>Coagulation factor V</b> OS=Bos<br>taurus GN=F5 PE=1 SV=1                                                    | 44.927  | 6  | 248.8 | 2.262 | 0.105281478 |
| <b>Spectrin beta chain, erythrocytic</b><br>OS=Homo sapiens GN=SPTB<br>PE=1 SV=5                                | 12.383  | 2  | 246.3 | 2.258 | 0.147269594 |
| <b>Tubulin-specific chaperone A</b><br>OS=Homo sapiens GN=TBCA<br>PE=1 SV=1                                     | 7.264   | 17 | 14.3  | 2.254 | 0.186907929 |
| <b>Collagen and calcium-binding</b><br>EGF domain-containing protein 1<br>OS=Homo sapiens GN=CCBE1<br>PE=1 SV=1 | 10.677  | 6  | 44.1  | 2.252 | 0.094653191 |
| <b>Thrombospondin-2</b> OS=Homo<br>sapiens GN=THBS2 PE=1 SV=2                                                   | 247.593 | 31 | 129.9 | 2.243 | 0.081827115 |
| <b>Olfactomedin-like protein 3</b><br>OS=Homo sapiens GN=OLFML3<br>PE=2 SV=1                                    | 72.286  | 33 | 46    | 2.237 | 0.128351268 |
| <b>Beta-lactoglobulin</b> OS=Bos<br>taurus GN=LGB PE=1 SV=3                                                     | 19.542  | 26 | 19.9  | 2.227 | 0.340678358 |
| <b>Syndecan-4</b> OS=Homo sapiens<br>GN=SDC4 PE=1 SV=2                                                          | 9.352   | 18 | 21.6  | 2.221 | 0.088384996 |
| <b>Vitamin K-dependent protein S</b><br>OS=Bos taurus GN=PROS1 PE=1<br>SV=1                                     | 37.99   | 12 | 75.1  | 2.22  | 0.08938092  |
| <b>Hemopexin</b> OS=Bos taurus<br>GN=HPX PE=2 SV=1                                                              | 168.945 | 53 | 52.2  | 2.212 | 0.105281478 |
| <b>Cysteine-rich motor neuron 1</b><br>protein OS=Homo sapiens<br>GN=CRIM1 PE=1 SV=1                            | 35.449  | 13 | 113.7 | 2.206 | 0.102018238 |
| <b>Dynactin subunit 2</b> OS=Homo<br>sapiens GN=DCTN2 PE=1 SV=4                                                 | 5.388   | 9  | 44.2  | 2.205 | 0.344046227 |
| <b>Follistatin</b> OS=Homo sapiens<br>GN=FST PE=1 SV=2                                                          | 52.858  | 51 | 38    | 2.203 | 0.105281478 |
| <b>Tropomyosin alpha-4 chain</b><br>(Fragment) OS=Homo sapiens<br>GN=TPM4 PE=1 SV=1                             | 6.861   | 29 | 8     | 2.192 | 0.094967147 |



|                                                                                                                         |        |    |       |       |             |
|-------------------------------------------------------------------------------------------------------------------------|--------|----|-------|-------|-------------|
| <b>Prohibitin OS=Homo sapiens<br/>GN=PHB PE=1 SV=1</b>                                                                  | 12.491 | 13 | 29.8  | 2.184 | 0.09767256  |
| <b>Serine/threonine-protein<br/>phosphatase PP1-alpha catalytic<br/>subunit OS=Homo sapiens<br/>GN=PPP1CA PE=1 SV=1</b> | 17.339 | 15 | 37.5  | 2.184 | 0.096141268 |
| <b>ATP-dependent 6-<br/>phosphofructokinase, platelet<br/>type OS=Homo sapiens GN=PFKP<br/>PE=1 SV=2</b>                | 7.379  | 5  | 85.5  | 2.176 | 0.251240961 |
| <b>Bone morphogenetic protein 1<br/>OS=Homo sapiens GN=BMP1<br/>PE=1 SV=2</b>                                           | 38.978 | 13 | 111.2 | 2.172 | 0.080976111 |
| <b>Fibrinogen beta chain OS=Bos<br/>taurus GN=FGB PE=1 SV=2</b>                                                         | 32.403 | 26 | 53.3  | 2.171 | 0.108390635 |
| <b>Transcription intermediary<br/>factor 1-beta OS=Homo sapiens<br/>GN=TRIM28 PE=1 SV=5</b>                             | 5.643  | 4  | 88.5  | 2.169 | 0.120272257 |
| <b>Metallothionein-1E OS=Homo<br/>sapiens GN=MT1E PE=1 SV=1</b>                                                         | 18.605 | 34 | 6     | 2.162 | 0.080976111 |
| <b>Glycerol-3-phosphate<br/>dehydrogenase [NAD(+)],<br/>cytoplasmic OS=Homo sapiens<br/>GN=GPD1 PE=1 SV=4</b>           | 13.763 | 6  | 37.5  | 2.161 | 0.084572846 |
| <b>Apolipoprotein M OS=Homo<br/>sapiens GN=APOM PE=1 SV=2</b>                                                           | 4.953  | 8  | 21.2  | 2.159 | 0.11747929  |
| <b>Hemoglobin subunit alpha<br/>OS=Bos taurus GN=HBA PE=1<br/>SV=2</b>                                                  | 57.779 | 44 | 15.2  | 2.15  | 0.104469424 |
| <b>Cadherin-2 OS=Homo sapiens<br/>GN=CDH2 PE=1 SV=4</b>                                                                 | 47.246 | 15 | 99.7  | 2.147 | 0.143803666 |
| <b>Thymosin beta-10 OS=Homo<br/>sapiens GN=TMSB10 PE=1 SV=2</b>                                                         | 20.223 | 32 | 5     | 2.137 | 0.104625132 |
| <b>Insulin-like growth factor II<br/>OS=Homo sapiens GN=IGF2 PE=1<br/>SV=1</b>                                          | 8.382  | 14 | 20.1  | 2.107 | 0.071992388 |
| <b>Casein kinase II subunit alpha<br/>OS=Homo sapiens GN=CSNK2A1<br/>PE=1 SV=1</b>                                      | 10.163 | 13 | 45.1  | 2.106 | 0.165154658 |
| <b>Tetranectin OS=Homo sapiens<br/>GN=CLEC3B PE=1 SV=3</b>                                                              | 53.094 | 43 | 22.5  | 2.101 | 0.083387977 |
| <b>Guanine nucleotide-binding<br/>protein G(I)/G(S)/G(T) subunit<br/>beta-2 OS=Homo sapiens<br/>GN=GNB2 PE=1 SV=3</b>   | 31.468 | 29 | 37.3  | 2.1   | 0.236685417 |
| <b>Peroxidasin homolog OS=Homo<br/>sapiens GN=PXDN PE=1 SV=2</b>                                                        | 92.379 | 19 | 165.2 | 2.098 | 0.105281478 |

|                                                                                                                      |         |    |       |       |             |
|----------------------------------------------------------------------------------------------------------------------|---------|----|-------|-------|-------------|
| <b>Alpha-S2-casein OS=Bos taurus<br/>GN=CSN1S2 PE=1 SV=2</b>                                                         | 16.139  | 14 | 26    | 2.081 | 0.471901593 |
| <b>Fibronectin type III domain-<br/>containing protein 1 OS=Homo<br/>sapiens GN=FNDC1 PE=2 SV=4</b>                  | 5.341   | 2  | 205.4 | 2.069 | 0.096141268 |
| <b>Adiponectin OS=Bos taurus<br/>GN=ADIPOQ PE=1 SV=1</b>                                                             | 52.145  | 29 | 26.1  | 2.069 | 0.104469424 |
| <b>Extracellular matrix protein 2<br/>OS=Homo sapiens GN=ECM2<br/>PE=2 SV=1</b>                                      | 8.424   | 3  | 79.7  | 2.067 | 0.150086044 |
| <b>Inhibin beta A chain OS=Homo<br/>sapiens GN=INHBA PE=1 SV=2</b>                                                   | 28.251  | 24 | 47.4  | 2.064 | 0.108094343 |
| <b>Dynamin-1-like protein<br/>OS=Homo sapiens GN=DNM1L<br/>PE=1 SV=2</b>                                             | 17.855  | 4  | 81.8  | 2.06  | 0.534393143 |
| <b>Disintegrin and<br/>metalloproteinase domain-<br/>containing protein 9 OS=Homo<br/>sapiens GN=ADAM9 PE=1 SV=1</b> | 34.445  | 8  | 90.5  | 2.059 | 0.096141268 |
| <b>Pentraxin-related protein PTX3<br/>OS=Homo sapiens GN=PTX3<br/>PE=1 SV=3</b>                                      | 175.434 | 42 | 41.9  | 2.058 | 0.104469424 |
| <b>Cation-independent mannose-6-<br/>phosphate receptor OS=Homo<br/>sapiens GN=IGF2R PE=1 SV=3</b>                   | 12.497  | 2  | 274.2 | 2.055 | 0.115617561 |
| <b>Vasorin OS=Homo sapiens<br/>GN=VASN PE=1 SV=1</b>                                                                 | 64.178  | 16 | 71.7  | 2.046 | 0.103996332 |
| <b>Phosphoserine aminotransferase<br/>OS=Homo sapiens GN=PSAT1<br/>PE=1 SV=2</b>                                     | 11.243  | 8  | 40.4  | 2.042 | 0.137227272 |
| <b>Tubulin alpha chain (Fragment)<br/>OS=Homo sapiens GN=TUBA8<br/>PE=1 SV=1</b>                                     | 111.661 | 34 | 52    | 2.035 | 0.11747929  |
| <b>Tubulin beta-2B chain OS=Homo<br/>sapiens GN=TUBB2B PE=1 SV=1</b>                                                 | 141.559 | 52 | 49.9  | 2.035 | 0.081827115 |
| <b>Apolipoprotein C-III OS=Homo<br/>sapiens GN=APOC3 PE=1 SV=1</b>                                                   | 15.83   | 16 | 12.8  | 2.031 | 0.104469424 |
| <b>Glutathione reductase,<br/>mitochondrial OS=Homo sapiens<br/>GN=GSR PE=1 SV=2</b>                                 | 6.318   | 5  | 56.2  | 2.025 | 0.094230369 |
| <b>Heterogeneous nuclear<br/>ribonucleoprotein Q OS=Homo<br/>sapiens GN=SYNCRIP PE=1 SV=2</b>                        | 7.417   | 5  | 69.6  | 2.017 | 0.232275714 |
| <b>Uncharacterized protein<br/>OS=Homo sapiens PE=3 SV=1</b>                                                         | 33.403  | 21 | 23.3  | 2.007 | 0.18026907  |
| <b>SPARC-like protein 1 OS=Homo<br/>sapiens GN=SPARCL1 PE=1 SV=2</b>                                                 | 5.612   | 3  | 75.2  | 2.001 | 0.194371613 |

**Supplementary Table S2. List of Primers for PCR.**

| Gene                 | Forward primer (5'-3') | Reverse primer (5'-3') |
|----------------------|------------------------|------------------------|
| Human <i>ACTB</i>    | TGGATCAGCAAGCAGGAGTATG | GCATTTGCGGTGGACGAT     |
| Human <i>CYP17A1</i> | GGCCTCAAATGGCAACTCTAGA | CTTCTGATCGCCATCCTTGAA  |
| Human <i>CYP11A1</i> | GAGGGAGACGGGCACACA     | TGACATAAACCGACTCCACGTT |
| Human <i>DENND1A</i> | CAATTCCCGGAGGACTACAGT  | AGCACGAATGTGAAGTTCTGG  |
